# Supplementary material for: Dental Stem Cell Migration on Pulp Ceiling Cavities Filled with MTA, Dentin Chips, or Bio-Oss
Source: Hindawi journal article supplement (doi:10.1155/2015/189872), 2015-01-01
Supplement: f1 [file 189872.f1.pdf]

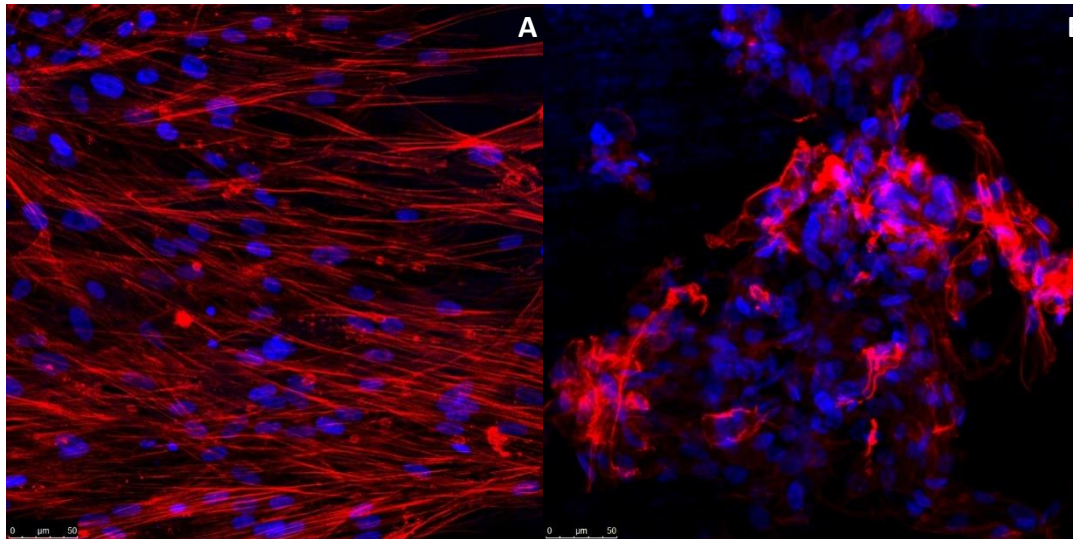

**Supplementary figure 1:** Representative images of the cell cultured on the surface of **(A)** human and **(B)** bovine dental disc by confocal microscopy. The cells were cultured for 72 hours on the provided specimens, fixed and stained with Phalloidin to depict the cytoskeleton of the dental mesenchymal stem cells (red) and DAPI for the nucleus (blue). The morphology and the clustering of the cells vary according to the origin of the dental disc.
